# Supplementary material for: Olive Leaf Extract Modulates Quorum Sensing Genes and Biofilm Formation in Multi-Drug Resistant Pseudomonas aeruginosa
Source: PubMed Central journal article supplement (PMC7560099; doi:10.3390/antibiotics9090526), 2020-08-19
Supplement: antibiotics-09-00526-s001.pdf [file antibiotics-09-00526-s001.pdf]

# Supplementary materials

*Type of the Paper (Article)*

## **Olive leaf extract modulates quorum sensing genes and biofilm formation in multi-drug resistant *Pseudomonas aeruginosa***

Nazly R. El-sayed<sup>1</sup>, Reham Samir <sup>2\*</sup>, Lina J. M. Abdel-Hafez<sup>1</sup>, and Mohammed A. Ramadan<sup>2</sup>

<sup>1</sup>Department of Microbiology and Immunology, Faculty of Pharmacy, 6 October University, 12585, Giza, Egypt

<sup>2</sup>Department of Microbiology and Immunology, Faculty of Pharmacy, Cairo University, 11562, Cairo, Egypt

\*Correspondence: email address; [reham.samer@pharma.cu.edu.eg](mailto:reham.samer@pharma.cu.edu.eg); Tel. :( 02-01224172986)

## Supplementary table 1

**Table S1.** Antibiotics breakpoints list. The table is showing different antibiotics breakpoints according to CLSI (2016) guidelines. These breakpoints were used to interpret the results of antibiotics disc diffusion test to determine the sensitivity of our *P. aeruginosa* isolates to tested antibiotics.

| Antimicrobial agent         | Disc potency | Zone diameter (mm) |              |           |
|-----------------------------|--------------|--------------------|--------------|-----------|
|                             |              | Susceptible        | Intermediate | Resistant |
| Amikacin                    | 30 µg        | ≥17                | 15-16        | ≤14       |
| Aztreonam                   | 30 µg        | ≥22                | 16-21        | ≤15       |
| Cefepime                    | 30 µg        | ≥18                | 15-17        | ≤14       |
| Ceftazidime                 | 30 µg        | ≥18                | 15-17        | ≤14       |
| Ciprofloxacin               | 5 µg         | ≥21                | 16-20        | ≤15       |
| Colistin                    | 10 µg        | ≥11                | -            | ≤10       |
| Gentamicin                  | 10 µg        | ≥15                | 13-14        | ≤12       |
| Imipenem                    | 10 µg        | ≥19                | 16-18        | ≤15       |
| Levofloxacin                | 5 µg         | ≥17                | 14-16        | ≤13       |
| Meropenem                   | 10 µg        | ≥19                | 16-18        | ≤15       |
| Piperacillin/Tazobactam     | 10/100 µg    | ≥21                | 15-20        | ≤14       |
| Ticarcillin/Clavulanic acid | 10/75 µg     | ≥24                | 16-23        | ≤15       |
| Tobramycin                  | 10 µg        | ≥15                | 13-14        | ≤12       |

**Table S2.** Qualitative phytochemical analysis and polyphenol contents of ethanol extracts of *Camellia sinensis* and *Olea europaea*

| <b>Plant constituent</b>    | <b><i>Camellia sinensis</i></b> | <b><i>Olea europaea</i></b> |
|-----------------------------|---------------------------------|-----------------------------|
| Tannin                      | +                               | +                           |
| Saponins                    | +                               | -                           |
| Anthraquinones              | -                               | -                           |
| Alkaloid                    | +                               | +                           |
| Flavonoids                  | +                               | +                           |
| Phenols                     | +                               | +                           |
| Cardiac glycoside           | -                               | -                           |
| Glycoside                   | +                               | +                           |
| Terpenoids                  | +                               | +                           |
| Anthocyanin                 | +                               | +                           |
| Polyphenol contents (mg/kg) | 2.93                            | 2.07                        |

+ = Presence, - = Absence

## Supplementary figure S1:

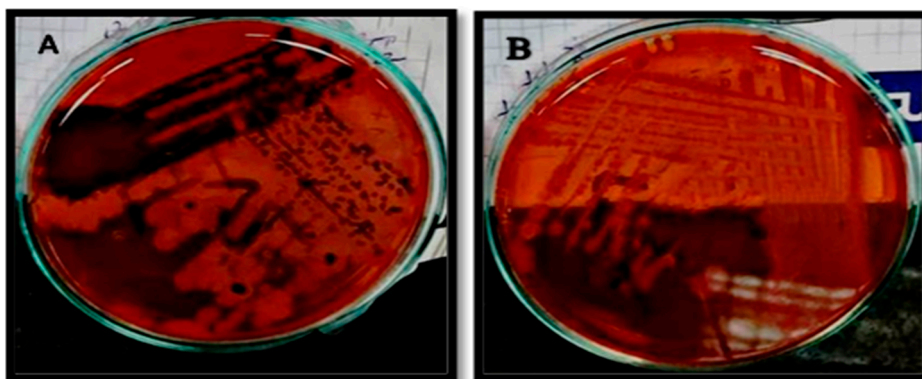

**Figure S1.** Biofilm formation by *Pseudomonas* isolates on Congo red agar plate. (A) Black colonies indicated the EPS production & biofilm formation by *P. aeruginosa* while (B) red colonies indicated non-biofilm producers. Congo red agar is a qualitative method performed onto agar plate surface.

## Supplementary figure S2:

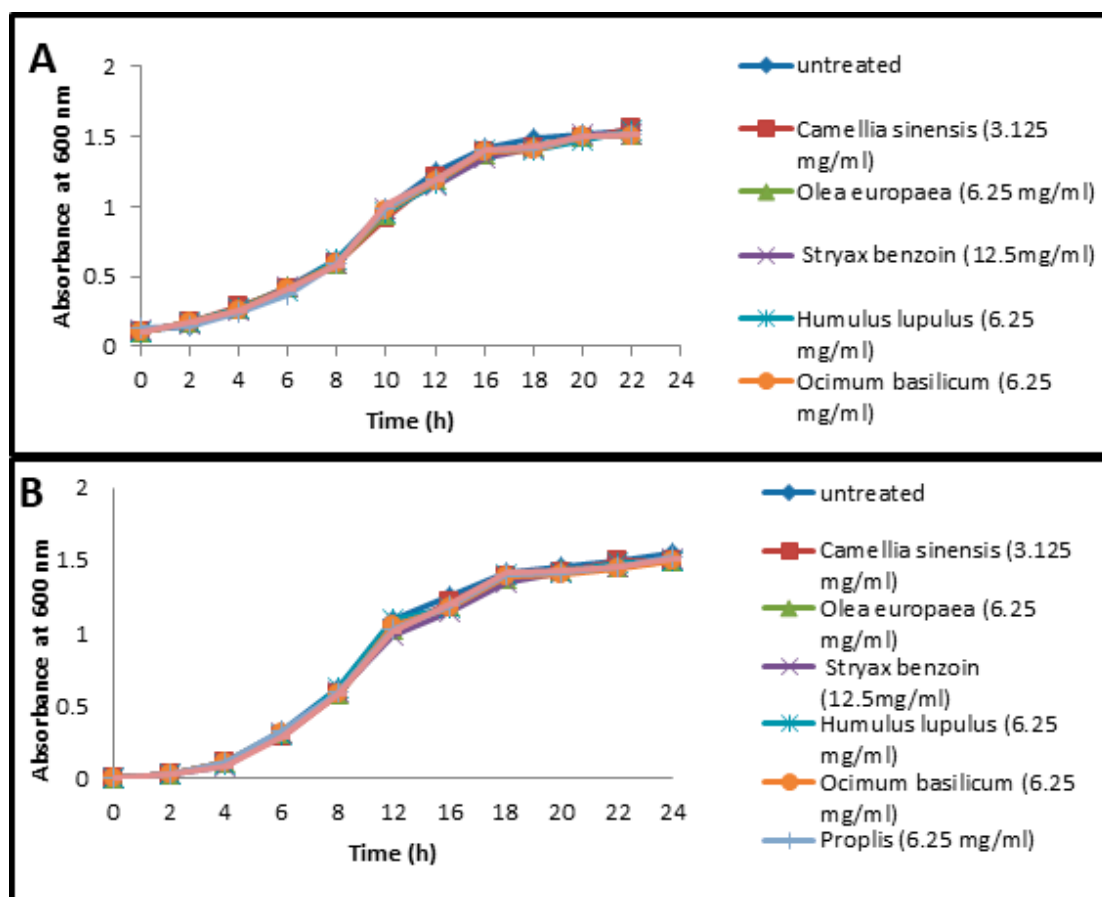

**Figure S2.** *P. aeruginosa* growth with and without the sub-MIC of different herpal extracts. (A) *P. aeruginosa* PAO1 (C21) growth curve, while (B) *P. aeruginosa* PAO1 (E81) growth curve treated and untreated with with *Camellia sinensis* (3.125 mg/ml), *Olea europaea* (6.25 mg/ml), *Stryax benzoin* (12.5mg/ml), *Humulus lupulus* (6.25 mg/ml), *Ocimum basilicum* (6.25 mg/ml), Propolis (6.25 mg/ml), *Ruta graveolans* (12.5 mg/ml) with respect to control every 2h at 37°C over 24 h.. The data represent as mean value  $\pm$  standard deviation and experiments performed in triplicate.
